# Supplementary material
Source: HighWire-hosted journal article supplement (https://bmjopen.bmj.com/content/11/3/e041512)
Supplement: inline-supplementary-material-1 [file inline-supplementary-material-1.pdf]

## Supplementary table 1A and 1B.

Table 1A. Concordance on HPV genotype for the HPV positive samples.

|                                                                   | Identical HPV genotype (No.) | Observed agreement | Kappa | 95% CI      |
|-------------------------------------------------------------------|------------------------------|--------------------|-------|-------------|
| Self-collected vaginal sample vs urine sample                     | 156/164                      | 95%                | 0,92  | 0,86 - 0,97 |
| Self-collected vaginal sample vs. Clinician-taken cervical sample | 147/164                      | 90%                | 0,82  | 0,74 - 0,90 |
| Urine sample vs Clinician-taken cervical sample                   | 143/164                      | 87%                | 0,78  | 0,70 - 0,86 |

CI: confidence interval

Table 1B. Itemized concordance on HPV genotypes for the HPV positive samples.

|                               |                     | Urine sample                    |             |               |                     |       |             |       |
|-------------------------------|---------------------|---------------------------------|-------------|---------------|---------------------|-------|-------------|-------|
|                               |                     | HPV16                           | HPV16+Other | HPV16 + HPV18 | HPV16 + HPV18+Other | HPV18 | HPV18+Other | Other |
| Self-collected vaginal sample | HPV16               | 23                              | 1           | 1             |                     |       |             |       |
|                               | HPV16+other         |                                 | 23          |               |                     |       |             |       |
|                               | HPV16 + HPV18       |                                 |             | 1             |                     |       |             |       |
|                               | HPV16 + HPV18+Other |                                 |             |               | 2                   |       |             |       |
|                               | HPV18               |                                 |             |               |                     | 4     | 1           |       |
|                               | HPV18+Other         |                                 |             |               | 1                   |       | 4           | 1     |
|                               | Other               |                                 | 2           |               |                     | 1     |             |       |
|                               |                     | Clinician-taken cervical sample |             |               |                     |       |             |       |
|                               |                     | HPV16                           | HPV16+Other | HPV16 + HPV18 | HPV16 + HPV18+Other | HPV18 | HPV18+Other | Other |
| Self-collected vaginal sample | HPV16               | 20                              | 3           |               |                     |       |             | 2     |
|                               | HPV16+other         | 6                               | 16          |               |                     |       |             | 1     |
|                               | HPV16 + HPV18       |                                 |             | 1             |                     |       |             |       |
|                               | HPV16 + HPV18+Other |                                 |             |               | 1                   | 1     |             |       |
|                               | HPV18               |                                 |             |               |                     | 4     | 1           |       |
|                               | HPV18+Other         |                                 |             |               |                     | 2     | 4           |       |
|                               | Other               |                                 |             |               |                     |       | 1           |       |
|                               |                     | Clinician-taken cervical sample |             |               |                     |       |             |       |
|                               |                     | HPV16                           | HPV16+Other | HPV16 + HPV18 | HPV16 + HPV18+Other | HPV18 | HPV18+Other | Other |
| Urine sample                  | HPV16               | 19                              | 2           |               |                     |       |             | 2     |
|                               | HPV16+other         | 6                               | 17          |               |                     |       |             | 3     |
|                               | HPV16 + HPV18       | 1                               |             | 1             |                     |       |             |       |
|                               | HPV16 + HPV18+Other |                                 |             |               | 1                   | 1     | 1           | 1     |
|                               | HPV18               |                                 |             |               |                     | 4     |             |       |
|                               | HPV18+Other         |                                 |             |               |                     | 2     | 3           |       |
|                               | Other               |                                 |             |               |                     |       | 2           |       |
